# Supplementary material
Source: ML conference proceedings conference paper supplement (https://openreview.net/forum?id=6EwuwivLSp)
Supplement: supplementary_material [file attachment]

## 6 APPENDIX

### 6.1 ADDITIONAL EXPERIMENTS

Table 3 reports the impact of different memory curation strategies on CIFAR-100-C under episodic Test-Time Adaptation (TTA). Results are averaged over 15 corruption types at severity 5. and Table 4 is the results on the continual version.

We first observe that even uninformed memories (e.g., FIFO, Reservoir) significantly boost performance compared to no memory, showing that simply caching and replaying recent samples benefits all adaptation methods in a dynamic stream. Next, class-guided memories such as PBRs and CSTU — which explicitly enforce class balance — achieve the highest accuracy, highlighting the importance of balanced memory composition.

Our proposed Guided Observational memories (DPP, FPS, FPSD) achieve comparable performance to these class-aware approaches while being more sample-efficient: they selectively admit diverse and informative samples, allowing the model to adapt with fewer updates. This effect is consistent across both episodic and continual evaluation settings, underscoring the robustness of our approach.

Table 3: Impact of memory curation policies on the performance of Test-Time Adaptation methods on CIFAR-100-C. The table shows the mean classification accuracy (%) on an episodic evaluation, averaged over 15 corruptions at severity 5. We compare three adaptation methods (RoTTA, Norm, NOTE) and analyze their sensitivity to the hyperparameter  $\gamma$  when combined with different memory strategies.

| Memory    | Rotta              |                    |                    | Norm               |                    |                    | Note               |                    |                    |
|-----------|--------------------|--------------------|--------------------|--------------------|--------------------|--------------------|--------------------|--------------------|--------------------|
|           | $\gamma = 10^{-4}$ | $\gamma = 10^{-3}$ | $\gamma = 10^{-1}$ | $\gamma = 10^{-4}$ | $\gamma = 10^{-3}$ | $\gamma = 10^{-1}$ | $\gamma = 10^{-4}$ | $\gamma = 10^{-3}$ | $\gamma = 10^{-1}$ |
| NONE      | 50.01              | 51.17              | 56.66              | 9.12               | 10.67              | 20.30              | 8.65               | 10.04              | 18.16              |
| FIFO      | <u>60.45</u>       | <u>60.95</u>       | <b>63.26</b>       | <u>62.27</u>       | <u>62.54</u>       | <u>63.74</u>       | 44.48              | 44.67              | 45.30              |
| RESERVOIR | 52.01              | 53.27              | 52.82              | 52.99              | 54.49              | 53.70              | 40.52              | 40.85              | 40.34              |
| CSTU      | 59.11              | 59.22              | 59.57              | 59.94              | 59.68              | 58.84              | <u>45.96</u>       | <b>46.08</b>       | <b>46.70</b>       |
| PBRs      | <b>62.30</b>       | <b>62.46</b>       | <u>63.16</u>       | <b>64.12</b>       | <b>64.20</b>       | <b>64.31</b>       | 45.02              | 45.39              | 45.96              |
| DPP       | 59.05              | 59.14              | 59.54              | 59.94              | 59.68              | 58.84              | <b>46.05</b>       | <u>46.08</u>       | <u>46.69</u>       |
| FPS       | 59.24              | 59.16              | 59.59              | 59.73              | 59.41              | 58.69              | 45.81              | 45.90              | 46.62              |
| FPSD      | 55.62              | 55.65              | 57.45              | 49.34              | 49.88              | 51.87              | 38.97              | 38.59              | 38.60              |

Table 4: Impact of memory curation policies on the performance of Test-Time Adaptation methods on CIFAR-100-C. The table shows the mean classification accuracy (%) on a continual evaluation, averaged over 15 corruptions at severity 5. We compare three adaptation methods (RoTTA, Norm, NOTE) and analyze their sensitivity to the hyperparameter  $\gamma$  when combined with different memory strategies.

| Memory    | Rotta              |                    |                    | Norm               |                    |                    | Note               |                    |                    |
|-----------|--------------------|--------------------|--------------------|--------------------|--------------------|--------------------|--------------------|--------------------|--------------------|
|           | $\gamma = 10^{-4}$ | $\gamma = 10^{-3}$ | $\gamma = 10^{-1}$ | $\gamma = 10^{-4}$ | $\gamma = 10^{-3}$ | $\gamma = 10^{-1}$ | $\gamma = 10^{-4}$ | $\gamma = 10^{-3}$ | $\gamma = 10^{-1}$ |
| NONE      | 50.27              | 51.36              | 57.03              | 9.12               | 10.67              | 20.30              | 2.94               | 3.38               | 6.04               |
| FIFO      | <u>60.40</u>       | <u>60.93</u>       | <b>63.40</b>       | <u>61.33</u>       | <u>61.59</u>       | <u>62.86</u>       | 10.26              | 10.50              | 11.96              |
| RESERVOIR | 46.25              | 47.42              | 46.75              | 52.30              | 53.98              | 53.09              | 18.15              | 17.70              | 17.88              |
| CSTU      | 58.31              | 59.29              | 60.65              | 56.54              | 56.47              | 55.51              | 20.14              | 20.99              | 23.57              |
| PBRs      | <b>61.02</b>       | <b>61.29</b>       | <u>62.61</u>       | <b>63.02</b>       | <b>63.02</b>       | <b>63.25</b>       | 17.44              | 18.91              | 19.83              |
| DPP       | 58.38              | 59.37              | 60.74              | 56.54              | 56.47              | 55.51              | 20.61              | 20.67              | 24.40              |
| FPS       | 58.50              | 59.32              | 60.89              | 56.38              | 56.20              | 55.29              | <u>20.66</u>       | <u>22.06</u>       | <u>26.95</u>       |
| FPSD      | 53.22              | 53.55              | 56.27              | 42.21              | 42.29              | 42.89              | <b>27.65</b>       | <b>26.50</b>       | <b>28.24</b>       |

The following table is the episodic version of 2

### 6.2 CODE IMPLEMENTATION

#### 6.2.1 FARTHEST POINT SAMPLING (FPS)

Table 5: Comparative analysis of memory curation policies under severe dataset shift. The table reports mean classification accuracy (%) on **CIFAR-10**  $\rightarrow$  **CIFAR-10C**, averaged over 15 common corruptions at the highest severity level (5). All evaluations are conducted in an **episodic** correlatively sampled stream with  $\gamma = 10^{-1}$ .

| Policy                  | Method<br>Memory | Source     | CoTTA        | EATA         | Energy       | ETA          | Norm         | NOTE         | PL           | RoTTA        | SAR          | SHOT         | TENT         |
|-------------------------|------------------|------------|--------------|--------------|--------------|--------------|--------------|--------------|--------------|--------------|--------------|--------------|--------------|
|                         |                  | Uninformed | NONE         | 56.49        | 23.54        | <b>24.72</b> | <b>24.72</b> | <b>24.72</b> | 24.72        | 25.75        | 16.46        | 47.53        | 24.75        |
|                         | FIFO             | -          | <b>24.72</b> | <b>24.72</b> | <b>24.72</b> | <b>24.72</b> | 65.07        | 73.15        | 16.07        | 53.92        | 24.74        | 23.81        | <b>24.72</b> |
|                         | Reservoir        | -          | <b>24.72</b> | <b>24.72</b> | <b>24.72</b> | <b>24.72</b> | 63.41        | 70.48        | 44.80        | 62.35        | 24.73        | 24.26        | <b>24.72</b> |
| Class-Guided            | PBRS             | -          | <b>24.72</b> | <b>24.72</b> | <b>24.72</b> | <b>24.72</b> | <b>76.71</b> | 74.03        | <b>51.28</b> | 74.48        | <b>24.75</b> | 23.89        | <b>24.72</b> |
|                         | CSTU             | -          | <b>24.72</b> | <b>24.72</b> | <b>24.72</b> | <b>24.72</b> | 75.72        | 73.77        | 41.26        | 73.49        | 24.72        | 23.76        | <b>24.72</b> |
| Guided<br>Observational | DPP (Ours)       | -          | <b>24.72</b> | <b>24.72</b> | <b>24.72</b> | <b>24.72</b> | 75.35        | 74.39        | 20.05        | 75.34        | 24.72        | 24.29        | <b>24.72</b> |
|                         | FPS (Ours)       | -          | <b>24.72</b> | <b>24.72</b> | <b>24.72</b> | <b>24.72</b> | 76.64        | 73.43        | 23.84        | <b>75.97</b> | 24.72        | <b>24.45</b> | <b>24.72</b> |
|                         | FPSD (Ours)      | -          | <b>24.72</b> | <b>24.72</b> | <b>24.72</b> | <b>24.72</b> | 76.43        | <b>74.93</b> | 48.60        | 71.47        | 24.72        | 23.13        | <b>24.72</b> |

```

1
2
3 class FPS(BaseMemory):
4     def __init__(self, capacity, num_class, min_dist=0.5, lambda_t=1.0, lambda_u=1.0):
5         super().__init__(capacity, num_class, lambda_t, lambda_u)
6         self.min_dist = min_dist
7
8     def add_instance(self, instance, is_update_feature=False):
9         """
10        Instance format: (x, prediction, uncertainty, feature)
11        """
12        new_item = instance
13        uncertainty = new_item.uncertainty
14        feature = new_item.feature
15        prediction = new_item.cls
16        new_score = self.heuristic_score(0, uncertainty)
17
18
19        if self.remove_instance(new_item) and not is_update_feature:
20            if self.adds_sufficient_diversity(feature, prediction):
21                self.data[prediction].append(new_item)
22            elif is_update_feature:
23                self.data[prediction].append(new_item)
24        self.add_age()
25
26     def adds_sufficient_diversity(self, feature, cls):
27         """Ensure new feature is not a near-duplicate within its class."""
28         class_list = self.data[cls]
29         if not class_list:
30             return True
31         features = np.array([item.feature for item in class_list])
32         dists = cdist(features, feature.reshape(1, -1), metric="euclidean").flatten()
33         return np.min(dists) > self.min_dist
34
35     def remove_instance(self, new_item):
36         class_list = self.data[new_item.cls]
37         if len(class_list) < self.per_class:
38             if self.get_occupancy() < self.capacity:
39                 return True
40             else:
41                 return self.remove_from_classes(self.get_majority_classes(), new_item)
42         return self.remove_from_classes([new_item.cls], new_item)
43
44

```

```

702
703 45
704 46 def remove_from_classes(self, classes, new_item):
705 47     """Remove one instance from given classes to make room, preserving diversity.
706 48     """
707 49     min_class, min_index, min_score, min_dist = None, None, None, None
708 50     score_base = self.heuristic_score(new_item.age, new_item.uncertainty)
709 51
710 52     for cls in classes:
711 53         if len(self.data[cls]) == 0:
712 54             continue
713 55
714 56         items = self.data[cls]
715 57         # Stack features of existing items (float32 to save memory)
716 58         features = np.stack([item.feature.astype(np.float32) for item in items])
717 59         new_f = new_item.feature.astype(np.float32)[None]
718 60
719 61         # Distances new_item - existing items
720 62         dists = cdist(new_f, features, metric="euclidean")[0]
721 63         nearest_idx = np.argmin(dists)
722 64         nearest_dist = dists[nearest_idx]
723 65
724 66         # Compare score between candidate and nearest existing item
725 67         existing_item = items[nearest_idx]
726 68         score_existing = self.heuristic_score(existing_item.age, existing_item.
727 69             uncertainty)
728 70         score_new = score_base
729 71
730 72         # Remove whichever is "worse"
731 73         if score_existing >= score_new:
732 74             remove_idx, remove_score = nearest_idx, score_existing
733 75         else:
734 76             remove_idx, remove_score = None, score_new # means: reject new item
735 77
736 78         # Keep track of best candidate removal across classes
737 79         if remove_idx is not None:
738 80             if min_dist is None or nearest_dist < min_dist:
739 81                 min_class, min_index, min_score, min_dist = cls, remove_idx,
740 82                 remove_score, nearest_dist
741 83
742 84         # Execute removal
743 85         if min_class is not None:
744 86             self.data[min_class].pop(min_index)
745 87             return True
746 88
747 89         return False
748 90
749 91 def timeliness_reweighting(self, ages):
750 92     if isinstance(ages, list):
751 93         ages = torch.tensor(ages).float().cuda()
752 94     return torch.exp(-ages) / (1 + torch.exp(-ages))
753 95
754 96 def update_features(self, cfg, model):
755 97     if cfg.MEMORY.IF_DYNAMIC:
756 98         batch, _ = self.get_memory()
757 99         self.clear()
758 100         batch = torch.stack(batch)
759 101         device = next(model.parameters()).device
760 102         batch = batch.to(device, non_blocking=True)
761 103         with torch.no_grad():
762 104             out = model(batch, if_adapt=False)
763 105             probs = F.softmax(out, dim=1)
764 106
765 107         # move features to CPU
766 108         features = out.cpu().numpy()

```

```

756 107         uncertainties = -torch.max(probs, dim=1).values.cpu().numpy()
757 108
758 109         # assign back
759 110         for i in range(len(batch)):
760 111             feature = features[i]
761 112             uncertainty = uncertainties[i]
762 113             x = batch[i].cpu()
763 114             prediction = torch.argmax(probs[i]).item()
764 115             instance = (x, prediction, uncertainty, feature)
765 116             self.add_instance(instance, is_update_feature=True)

```

Listing 1: Python implementation of the FPS memory policy.

## 6.2.2 DETERMINANTAL POINT PROCESS (DPP)

```

770 1
771 2 class DPP(BaseMemory):
772 3     def __init__(self, capacity, num_class=2, sample_check=50):
773 4         super().__init__(capacity, num_class)
774 5         self.sample_check = sample_check
775 6
776 7     def adds_diversity(self, new_item, min_cos_dist=0.1):
777 8         class_list = self.data[new_item.cls]
778 9         if not class_list:
779 10             return True
780 11         sample = random.sample(class_list, min(self.sample_check, len(class_list)))
781 12         nf = new_item.feature / (np.linalg.norm(new_item.feature) + 1e-8)
782 13         feats_n = np.array([it.feature / (np.linalg.norm(it.feature) + 1e-8) for it
783 14             in sample])
784 15         sims = feats_n @ nf
785 16         return np.max(sims) < (1 - min_cos_dist)
786 17
787 18     def remove_from_classes(self, classes, new_item):
788 19         min_class = None
789 20         min_index = None
790 21         min_score = None
791 22         score_base = self.heuristic_score(new_item.age, new_item.uncertainty)
792 23         for cls in classes:
793 24             if not self.data[cls]:
794 25                 continue
795 26
796 27             items = self.data[cls] + [new_item]
797 28             feats = np.array([it.feature / (np.linalg.norm(it.feature) + 1e-8) for it
798 29                 in items])
799 30             sims = feats @ feats.T
800 31             np.fill_diagonal(sims, -1)
801 32             redundant_idx = np.unravel_index(np.argmax(sims), sims.shape)[0]
802 33             if redundant_idx < len(self.data[cls]):
803 34                 item = self.data[cls][redundant_idx]
804 35                 score = self.heuristic_score(item.age, item.uncertainty)
805 36                 if min_score is None or score >= min_score:
806 37                     min_class, min_index, min_score = cls, redundant_idx, score
807 38         if min_class is not None and min_score >= score_base:
808 39             self.data[min_class].pop(min_index)
809 40             return True
810 41         return False
811 42
812 43     def remove_instance(self, new_item):
813 44         cls = new_item.cls
814 45         if len(self.data[cls]) < self.per_class:
815 46             if self.get_occupancy() < self.capacity:
816 47                 return True
817 48             else:
818 49                 majority = np.argmax([len(x) for x in self.data])

```

```
810 48         return self.remove_from_classes([majority], new_item)
811 49     else:
812 50         return self.remove_from_classes([cls], new_item)
813 51
814 52     def add_instance(self, new_item):
815 53         if self.remove_instance(new_item):
816 54             if self.adds_diversity(new_item):
817 55                 self.data[new_item.cls].append(new_item)
818 56         self.add_age()
```

Listing 2: Python implementation of the DPP memory policy.

818  
819  
820  
821  
822  
823  
824  
825  
826  
827  
828  
829  
830  
831  
832  
833  
834  
835  
836  
837  
838  
839  
840  
841  
842  
843  
844  
845  
846  
847  
848  
849  
850  
851  
852  
853  
854  
855  
856  
857  
858  
859  
860  
861  
862  
863
